# Supplementary material for: Analysis of key genes of jasmonic acid mediated signal pathway for defense against insect damages by comparative transcriptome sequencing
Source: PubMed Central journal article supplement (PMC4642351; doi:10.1038/srep16500), 2015-11-12
Supplement: srep16500-s1.pdf [file srep16500-s1.pdf]

1 **Analysis of key genes of jasmonic acid mediated signal pathway for defense against insect damages by**  
2 **comparative transcriptome sequencing**

3  
4  
5 Fengshan Yang<sup>1#</sup>, Yuliang Zhang<sup>2#</sup>, Qixing Huang<sup>2</sup>, Guohua Yin<sup>2,3\*</sup>, Kayla K. Pennerman<sup>3</sup>, Jiujiang Yu<sup>4</sup>, Zhixin Liu<sup>2</sup>, Dafei Li<sup>1</sup>, Anping Guo<sup>2\*</sup>

6  
7  
8 <sup>1</sup>Key Laboratory of Molecular Biology of Heilongjiang Province, College of Life Sciences, Heilongjiang University, Harbin, Heilongjiang  
9 150080, China

10 <sup>2</sup>Key Laboratory of Biology and Genetic Resources of Tropical Crops, Ministry of Agriculture, Institute of Tropical Bioscience and Biotechnology,  
11 Chinese Academy of Tropical Agricultural Sciences, Haikou, Hainan 571101, China

12 <sup>3</sup>Department of Plant Biology and Pathology, Rutgers, The State University of New Jersey, New Brunswick, New Jersey 08901, United States

13 <sup>4</sup>Department of Agriculture, ARS, Beltsville Agricultural Research Center, Beltsville, Maryland 20705, USA

14  
15 \*Corresponding authors: Guohua Yin, [guohuayin1997@gmail.com](mailto:guohuayin1997@gmail.com); Anping Guo, [gap211@126.com](mailto:gap211@126.com)

16

17

18

19 **Supplementary tables**

20 Table S1 GO term of CornJA1 vs Corn1

21 Table S2 GO term of CornOf2 vs Corn1

22 Table S3 GO term of CornJAOf2 vs Corn1

23 Table S4 KEGG pathways of CornJA1 vs Corn1

24 Table S5 KEGG pathways of CornOf2 vs Corn1

25 Table S6 KEGG pathways of CornJAOf2 vs Corn1

26 Table S7 Fifteen screened genes involved in maize defense resistance against Asian corn borer feeding

27 Table S8 Nine up-regulated gene expression patterns identified by both RNA-Seq and qRT-PCR

28

29

30

31

32

33

34

35

**Table S1 Go term of CornJA1 Vs Corn1**

| <b>Gene Ontology term</b>                      | <b>Cluster frequency</b> |        | <b>Genome frequency of use</b> |        |
|------------------------------------------------|--------------------------|--------|--------------------------------|--------|
| <b>Biological process</b>                      |                          |        |                                |        |
| biological process                             | 111/177                  | 62.71% | 31234/63459                    | 49.22% |
| metabolic process                              | 81/177                   | 45.76% | 21185/63459                    | 33.38% |
| response to stimulus                           | 47/177                   | 26.55% | 8333/63459                     | 13.13% |
| organonitrogen compound metabolic process      | 33/177                   | 18.64% | 6142/63459                     | 9.68%  |
| response to abiotic stimulus                   | 29/177                   | 16.38% | 3267/63459                     | 5.15%  |
| carboxylic acid metabolic process              | 29/177                   | 16.38% | 4725/63459                     | 7.45%  |
| oxoacid metabolic process                      | 29/177                   | 16.38% | 4779/63459                     | 7.53%  |
| organic acid metabolic process                 | 29/177                   | 16.38% | 4785/63459                     | 7.54%  |
| cellular amino acid metabolic process          | 27/177                   | 15.25% | 3827/63459                     | 6.03%  |
| response to chemical stimulus                  | 25/177                   | 14.12% | 3899/63459                     | 6.14%  |
| oxidation-reduction process                    | 23/177                   | 12.99% | 3470/63459                     | 5.47%  |
| response to inorganic substance                | 21/177                   | 11.86% | 2207/63459                     | 3.48%  |
| sulfur compound metabolic process              | 16/177                   | 9.04%  | 645/63459                      | 1.02%  |
| response to light stimulus                     | 14/177                   | 7.91%  | 972/63459                      | 1.53%  |
| response to radiation                          | 14/177                   | 7.91%  | 1016/63459                     | 1.60%  |
| response to metal ion                          | 14/177                   | 7.91%  | 1470/63459                     | 2.32%  |
| response to endogenous stimulus                | 14/177                   | 7.91%  | 1709/63459                     | 2.69%  |
| response to hormone stimulus                   | 14/177                   | 7.91%  | 1664/63459                     | 2.62%  |
| cellular amide metabolic process               | 13/177                   | 7.34%  | 334/63459                      | 0.53%  |
| response to cadmium ion                        | 13/177                   | 7.34%  | 1242/63459                     | 1.96%  |
| peptide metabolic process                      | 12/177                   | 6.78%  | 190/63459                      | 0.30%  |
| glutathione metabolic process                  | 12/177                   | 6.78%  | 152/63459                      | 0.24%  |
| response to karrikin                           | 12/177                   | 6.78%  | 307/63459                      | 0.48%  |
| glutathione conjugation reaction               | 12/177                   | 6.78%  | 82/63459                       | 0.13%  |
| cellular modified amino acid metabolic process | 12/177                   | 6.78%  | 378/63459                      | 0.60%  |

|                                           |        |       |            |       |
|-------------------------------------------|--------|-------|------------|-------|
| response to other organism                | 12/177 | 6.78% | 1284/63459 | 2.02% |
| response to biotic stimulus               | 12/177 | 6.78% | 1388/63459 | 2.19% |
| secondary metabolic process               | 8/177  | 4.52% | 364/63459  | 0.57% |
| response to water stimulus                | 8/177  | 4.52% | 515/63459  | 0.81% |
| response to organic nitrogen              | 7/177  | 3.95% | 103/63459  | 0.16% |
| pigment biosynthetic process              | 7/177  | 3.95% | 224/63459  | 0.35% |
| secondary metabolite biosynthetic process | 7/177  | 3.95% | 258/63459  | 0.41% |
| pigment metabolic process                 | 7/177  | 3.95% | 290/63459  | 0.46% |
| post-embryonic development                | 7/177  | 3.95% | 514/63459  | 0.81% |
| response to peptide hormone stimulus      | 6/177  | 3.39% | 34/63459   | 0.05% |
| response to peptide                       | 6/177  | 3.39% | 34/63459   | 0.05% |
| response to growth hormone stimulus       | 6/177  | 3.39% | 34/63459   | 0.05% |
| de-etiolation                             | 6/177  | 3.39% | 41/63459   | 0.06% |
| lateral root development                  | 6/177  | 3.39% | 74/63459   | 0.12% |
| post-embryonic root development           | 6/177  | 3.39% | 97/63459   | 0.15% |
| phenylpropanoid biosynthetic process      | 6/177  | 3.39% | 187/63459  | 0.29% |
| post-embryonic organ development          | 6/177  | 3.39% | 199/63459  | 0.31% |
| phenylpropanoid metabolic process         | 6/177  | 3.39% | 270/63459  | 0.43% |
| root development                          | 6/177  | 3.39% | 307/63459  | 0.48% |
| regulation of hormone levels              | 6/177  | 3.39% | 313/63459  | 0.49% |
| hormone metabolic process                 | 5/177  | 2.82% | 200/63459  | 0.32% |
| cellular response to abiotic stimulus     | 4/177  | 2.26% | 137/63459  | 0.22% |
| protein glutathionylation                 | 3/177  | 1.69% | 28/63459   | 0.04% |
| brassinosteroid metabolic process         | 3/177  | 1.69% | 34/63459   | 0.05% |
| phytosteroid metabolic process            | 3/177  | 1.69% | 35/63459   | 0.06% |
| flavonoid biosynthetic process            | 3/177  | 1.69% | 45/63459   | 0.07% |
| stilbene metabolic process                | 3/177  | 1.69% | 57/63459   | 0.09% |
| stilbene biosynthetic process             | 3/177  | 1.69% | 57/63459   | 0.09% |
| coumarin biosynthetic process             | 3/177  | 1.69% | 58/63459   | 0.09% |

|                                                                                                       |        |        |             |        |
|-------------------------------------------------------------------------------------------------------|--------|--------|-------------|--------|
| coumarin metabolic process                                                                            | 3/177  | 1.69%  | 58/63459    | 0.09%  |
| siroheme metabolic process                                                                            | 2/177  | 1.13%  | 9/63459     | 0.01%  |
| siroheme biosynthetic process                                                                         | 2/177  | 1.13%  | 9/63459     | 0.01%  |
| <b>Cellular component</b>                                                                             |        |        |             |        |
| extracellular region                                                                                  | 11/177 | 6.21%  | 1241/63459  | 1.96%  |
| <b>Molecular function</b>                                                                             |        |        |             |        |
| catalytic activity                                                                                    | 86/177 | 48.59% | 20322/63459 | 32.02% |
| transferase activity                                                                                  | 47/177 | 26.55% | 7743/63459  | 12.20% |
| oxidoreductase activity                                                                               | 23/177 | 12.99% | 3457/63459  | 5.45%  |
| transferase activity, transferring glycosyl groups                                                    | 17/177 | 9.60%  | 1337/63459  | 2.11%  |
| transferase activity, transferring hexosyl groups                                                     | 15/177 | 8.47%  | 932/63459   | 1.47%  |
| transferase activity, transferring alkyl or aryl (other than methyl) groups                           | 14/177 | 7.91%  | 267/63459   | 0.42%  |
| glutathione transferase activity                                                                      | 12/177 | 6.78%  | 82/63459    | 0.13%  |
| iron ion binding                                                                                      | 10/177 | 5.65%  | 739/63459   | 1.16%  |
| oxidoreductase activity, acting on paired donors, with incorporation or reduction of molecular oxygen | 9/177  | 5.08%  | 783/63459   | 1.23%  |
| monooxygenase activity                                                                                | 8/177  | 4.52%  | 483/63459   | 0.76%  |
| quercetin 7-O-glucosyltransferase activity                                                            | 4/177  | 2.26%  | 16/63459    | 0.03%  |
| quercetin 3-O-glucosyltransferase activity                                                            | 3/177  | 1.69%  | 14/63459    | 0.02%  |
| quercetin 4'-O-glucosyltransferase activity                                                           | 3/177  | 1.69%  | 18/63459    | 0.03%  |
| precorrin-2 dehydrogenase activity                                                                    | 2/177  | 1.13%  | 4/63459     | 0.01%  |
| chitin binding                                                                                        | 2/177  | 1.13%  | 15/63459    | 0.02%  |
| carbohydrate derivative binding                                                                       | 2/177  | 1.13%  | 15/63459    | 0.02%  |
| trans-zeatin O-beta-D-glucosyltransferase activity                                                    | 2/177  | 1.13%  | 15/63459    | 0.02%  |

36

37

**Table S2 Go term of CornOf2 Vs Corn1**

| <b>Gene Ontology term</b>                      | <b>Cluster frequency</b> |        | <b>Genome frequency of use</b> |        |
|------------------------------------------------|--------------------------|--------|--------------------------------|--------|
| <b>Biological process</b>                      |                          |        |                                |        |
| biological process                             | 134/200                  | 67%    | 31234/63459                    | 49.22% |
| metabolic process                              | 98/200                   | 49%    | 21185/63459                    | 33.38% |
| response to stimulus                           | 50/200                   | 25%    | 8333/63459                     | 13.13% |
| oxidation-reduction process                    | 36/200                   | 18%    | 3470/63459                     | 5.47%  |
| carboxylic acid metabolic process              | 31/200                   | 15.50% | 4725/63459                     | 7.45%  |
| oxoacid metabolic process                      | 31/200                   | 15.50% | 4779/63459                     | 7.53%  |
| organic acid metabolic process                 | 31/200                   | 15.50% | 4785/63459                     | 7.54%  |
| response to stress                             | 30/200                   | 15%    | 4692/63459                     | 7.39%  |
| single-organism biosynthetic process           | 20/200                   | 10%    | 1991/63459                     | 3.14%  |
| sulfur compound metabolic process              | 16/200                   | 8%     | 645/63459                      | 1.02%  |
| electron transport                             | 16/200                   | 8%     | 1029/63459                     | 1.62%  |
| response to endogenous stimulus                | 15/200                   | 7.50%  | 1709/63459                     | 2.69%  |
| response to hormone stimulus                   | 14/200                   | 7%     | 1664/63459                     | 2.62%  |
| response to other organism                     | 13/200                   | 6.50%  | 1284/63459                     | 2.02%  |
| response to biotic stimulus                    | 13/200                   | 6.50%  | 1388/63459                     | 2.19%  |
| cellular amide metabolic process               | 11/200                   | 5.50%  | 334/63459                      | 0.53%  |
| glutathione conjugation reaction               | 9/200                    | 4.50%  | 82/63459                       | 0.13%  |
| glutathione metabolic process                  | 9/200                    | 4.50%  | 152/63459                      | 0.24%  |
| peptide metabolic process                      | 9/200                    | 4.50%  | 190/63459                      | 0.30%  |
| response to karrikin                           | 9/200                    | 4.50%  | 307/63459                      | 0.48%  |
| secondary metabolic process                    | 9/200                    | 4.50%  | 364/63459                      | 0.57%  |
| cellular modified amino acid metabolic process | 9/200                    | 4.50%  | 378/63459                      | 0.60%  |
| response to wounding                           | 8/200                    | 4%     | 322/63459                      | 0.51%  |
| secondary metabolite biosynthetic process      | 7/200                    | 3.50%  | 258/63459                      | 0.41%  |
| hormone metabolic process                      | 6/200                    | 3%     | 200/63459                      | 0.32%  |
| pigment biosynthetic process                   | 6/200                    | 3%     | 224/63459                      | 0.35%  |

|                                               |       |       |           |       |
|-----------------------------------------------|-------|-------|-----------|-------|
| pigment metabolic process                     | 6/200 | 3%    | 290/63459 | 0.46% |
| regulation of hormone levels                  | 6/200 | 3%    | 313/63459 | 0.49% |
| benzene-containing compound metabolic process | 5/200 | 2.50% | 100/63459 | 0.16% |
| response to organic nitrogen                  | 5/200 | 2.50% | 103/63459 | 0.16% |
| phenylpropanoid biosynthetic process          | 5/200 | 2.50% | 187/63459 | 0.29% |
| steroid metabolic process                     | 5/200 | 2.50% | 215/63459 | 0.34% |
| cellular response to extracellular stimulus   | 5/200 | 2.50% | 219/63459 | 0.35% |
| cellular response to external stimulus        | 5/200 | 2.50% | 219/63459 | 0.35% |
| S-glycoside metabolic process                 | 4/200 | 2%    | 48/63459  | 0.08% |
| glycosinolate metabolic process               | 4/200 | 2%    | 48/63459  | 0.08% |
| glucosinolate metabolic process               | 4/200 | 2%    | 48/63459  | 0.08% |
| benzoate metabolic process                    | 4/200 | 2%    | 53/63459  | 0.08% |
| cellular response to abiotic stimulus         | 4/200 | 2%    | 137/63459 | 0.22% |
| toluene metabolic process                     | 3/200 | 1.50% | 23/63459  | 0.04% |
| toluene-containing compound metabolic process | 3/200 | 1.50% | 23/63459  | 0.04% |
| toluene-containing compound catabolic process | 3/200 | 1.50% | 23/63459  | 0.04% |
| xylene catabolic process                      | 3/200 | 1.50% | 23/63459  | 0.04% |
| xylene metabolic process                      | 3/200 | 1.50% | 23/63459  | 0.04% |
| toluene catabolic process                     | 3/200 | 1.50% | 23/63459  | 0.04% |
| response to peptide hormone stimulus          | 3/200 | 1.50% | 34/63459  | 0.05% |
| brassinosteroid metabolic process             | 3/200 | 1.50% | 34/63459  | 0.05% |
| response to peptide                           | 3/200 | 1.50% | 34/63459  | 0.05% |
| response to growth hormone stimulus           | 3/200 | 1.50% | 34/63459  | 0.05% |
| phytosteroid metabolic process                | 3/200 | 1.50% | 35/63459  | 0.06% |
| jasmonic acid biosynthetic process            | 3/200 | 1.50% | 41/63459  | 0.06% |
| de-etiolation                                 | 3/200 | 1.50% | 41/63459  | 0.06% |
| flavonoid biosynthetic process                | 3/200 | 1.50% | 45/63459  | 0.07% |
| xenobiotic catabolic process                  | 3/200 | 1.50% | 47/63459  | 0.07% |
| jasmonic acid metabolic process               | 3/200 | 1.50% | 51/63459  | 0.08% |

|                                                                                                                               |         |        |             |        |
|-------------------------------------------------------------------------------------------------------------------------------|---------|--------|-------------|--------|
| oxylipin metabolic process                                                                                                    | 3/200   | 1.50%  | 58/63459    | 0.09%  |
| siroheme metabolic process                                                                                                    | 2/200   | 1%     | 9/63459     | 0.01%  |
| siroheme biosynthetic process                                                                                                 | 2/200   | 1%     | 9/63459     | 0.01%  |
| <b>Molecular function</b>                                                                                                     |         |        |             |        |
| molecular_function                                                                                                            | 135/200 | 67.50% | 34124/63459 | 53.77% |
| catalytic activity                                                                                                            | 100/200 | 50%    | 20322/63459 | 32.02% |
| transferase activity                                                                                                          | 41/200  | 20.50% | 7743/63459  | 12.20% |
| oxidoreductase activity                                                                                                       | 36/200  | 18%    | 3457/63459  | 5.45%  |
| metal ion binding                                                                                                             | 27/200  | 13.50% | 4268/63459  | 6.73%  |
| transition metal ion binding                                                                                                  | 22/200  | 11%    | 1617/63459  | 2.55%  |
| iron ion binding                                                                                                              | 18/200  | 9%     | 739/63459   | 1.16%  |
| oxidoreductase activity, acting on paired donors, with incorporation or reduction of molecular oxygen                         | 16/200  | 8%     | 783/63459   | 1.23%  |
| electron carrier activity                                                                                                     | 16/200  | 8%     | 833/63459   | 1.31%  |
| heme binding                                                                                                                  | 14/200  | 7%     | 725/63459   | 1.14%  |
| tetrapyrrole binding                                                                                                          | 14/200  | 7%     | 757/63459   | 1.19%  |
| transferase activity, transferring glycosyl groups                                                                            | 13/200  | 6.50%  | 1337/63459  | 2.11%  |
| monooxygenase activity                                                                                                        | 12/200  | 6%     | 483/63459   | 0.76%  |
| transferase activity, transferring hexosyl groups                                                                             | 12/200  | 6%     | 932/63459   | 1.47%  |
| transferase activity, transferring alkyl or aryl (other than methyl) groups                                                   | 10/200  | 5%     | 267/63459   | 0.42%  |
| glutathione transferase activity                                                                                              | 9/200   | 4.50%  | 82/63459    | 0.13%  |
| dioxygenase activity                                                                                                          | 8/200   | 4%     | 361/63459   | 0.57%  |
| oxidoreductase activity, acting on single donors with incorporation of molecular oxygen, incorporation of two atoms of oxygen | 5/200   | 2.50%  | 137/63459   | 0.22%  |
| oxidoreductase activity, acting on single donors with incorporation of molecular oxygen                                       | 5/200   | 2.50%  | 155/63459   | 0.24%  |
| quercetin 7-O-glucosyltransferase activity                                                                                    | 4/200   | 2%     | 16/63459    | 0.03%  |



|                                                                                            |       |       |          |       |
|--------------------------------------------------------------------------------------------|-------|-------|----------|-------|
| oxidoreductase activity, acting on the CH-CH group of donors, NAD or NADP as acceptor      | 4/200 | 2%    | 73/63459 | 0.12% |
| quercetin 3-O-glucosyltransferase activity                                                 | 3/200 | 1.50% | 14/63459 | 0.02% |
| quercetin 4'-O-glucosyltransferase activity                                                | 3/200 | 1.50% | 18/63459 | 0.03% |
| precorrin-2 dehydrogenase activity                                                         | 2/200 | 1%    | 4/63459  | 0.01% |
| 12-oxophytodienoate reductase activity                                                     | 2/200 | 1%    | 7/63459  | 0.01% |
| FAD binding                                                                                | 2/200 | 1%    | 8/63459  | 0.01% |
| oxidoreductase activity, acting on the aldehyde or oxo group of donors, oxygen as acceptor | 2/200 | 1%    | 13/63459 | 0.02% |
| aldehyde oxidase activity                                                                  | 2/200 | 1%    | 13/63459 | 0.02% |
| benzaldehyde dehydrogenase (NAD <sup>+</sup> ) activity                                    | 2/200 | 1%    | 13/63459 | 0.02% |
| abscisic aldehyde oxidase activity                                                         | 2/200 | 1%    | 13/63459 | 0.02% |
| aryl-aldehyde oxidase activity                                                             | 2/200 | 1%    | 13/63459 | 0.02% |
| indole-3-acetaldehyde oxidase activity                                                     | 2/200 | 1%    | 13/63459 | 0.02% |
| molybdopterin cofactor binding                                                             | 2/200 | 1%    | 14/63459 | 0.02% |

---

**Table S3 Go term of CornJAOf2 Vs Corn1**

| <b>Gene Ontology term</b>             | <b>Cluster frequency</b> |        | <b>Genome frequency of use</b> |        |
|---------------------------------------|--------------------------|--------|--------------------------------|--------|
| <b>Biological process</b>             |                          |        |                                |        |
| biological process                    | 150/240                  | 62.50% | 31234/63459                    | 49.22% |
| metabolic process                     | 109/240                  | 45.42% | 21185/63459                    | 33.38% |
| response to stimulus                  | 58/240                   | 24.17% | 8333/63459                     | 13.13% |
| biosynthetic process                  | 40/240                   | 16.67% | 6128/63459                     | 9.66%  |
| cellular biosynthetic process         | 38/240                   | 15.83% | 5531/63459                     | 8.72%  |
| oxidation-reduction process           | 37/240                   | 15.42% | 3470/63459                     | 5.47%  |
| oxoacid metabolic process             | 36/240                   | 15%    | 4779/63459                     | 7.53%  |
| organic acid metabolic process        | 36/240                   | 15%    | 4785/63459                     | 7.54%  |
| carboxylic acid metabolic process     | 35/240                   | 14.58% | 4725/63459                     | 7.45%  |
| response to abiotic stimulus          | 33/240                   | 13.75% | 3267/63459                     | 5.15%  |
| response to stress                    | 33/240                   | 13.75% | 4692/63459                     | 7.39%  |
| response to chemical stimulus         | 31/240                   | 12.92% | 3899/63459                     | 6.14%  |
| single-organism biosynthetic process  | 25/240                   | 10.42% | 1991/63459                     | 3.14%  |
| response to inorganic substance       | 21/240                   | 8.75%  | 2207/63459                     | 3.48%  |
| small molecule biosynthetic process   | 18/240                   | 7.50%  | 1827/63459                     | 2.88%  |
| response to biotic stimulus           | 17/240                   | 7.08%  | 1388/63459                     | 2.19%  |
| response to hormone stimulus          | 17/240                   | 7.08%  | 1664/63459                     | 2.62%  |
| response to endogenous stimulus       | 17/240                   | 7.08%  | 1709/63459                     | 2.69%  |
| sulfur compound metabolic process     | 15/240                   | 6.25%  | 645/63459                      | 1.02%  |
| carboxylic acid biosynthetic process  | 15/240                   | 6.25%  | 1396/63459                     | 2.20%  |
| organic acid biosynthetic process     | 15/240                   | 6.25%  | 1396/63459                     | 2.20%  |
| response to light stimulus            | 14/240                   | 5.83%  | 972/63459                      | 1.53%  |
| response to radiation                 | 14/240                   | 5.83%  | 1016/63459                     | 1.60%  |
| monocarboxylic acid metabolic process | 14/240                   | 5.83%  | 1127/63459                     | 1.78%  |
| response to other organism            | 14/240                   | 5.83%  | 1284/63459                     | 2.02%  |

|                                                |        |       |           |       |
|------------------------------------------------|--------|-------|-----------|-------|
| cellular amide metabolic process               | 11/240 | 4.58% | 334/63459 | 0.53% |
| response to water stimulus                     | 11/240 | 4.58% | 515/63459 | 0.81% |
| cellular modified amino acid metabolic process | 10/240 | 4.17% | 378/63459 | 0.60% |
| secondary metabolic process                    | 10/240 | 4.17% | 364/63459 | 0.57% |
| monocarboxylic acid biosynthetic process       | 10/240 | 4.17% | 625/63459 | 0.98% |
| response to cold                               | 10/240 | 4.17% | 713/63459 | 1.12% |
| glutathione conjugation reaction               | 9/240  | 3.75% | 82/63459  | 0.13% |
| glutathione metabolic process                  | 9/240  | 3.75% | 152/63459 | 0.24% |
| peptide metabolic process                      | 9/240  | 3.75% | 190/63459 | 0.30% |
| pigment biosynthetic process                   | 9/240  | 3.75% | 224/63459 | 0.35% |
| pigment metabolic process                      | 9/240  | 3.75% | 290/63459 | 0.46% |
| response to karrikin                           | 9/240  | 3.75% | 307/63459 | 0.48% |
| response to water deprivation                  | 9/240  | 3.75% | 479/63459 | 0.75% |
| secondary metabolite biosynthetic process      | 8/240  | 3.33% | 258/63459 | 0.41% |
| phenylpropanoid metabolic process              | 8/240  | 3.33% | 270/63459 | 0.43% |
| post-embryonic development                     | 8/240  | 3.33% | 514/63459 | 0.81% |
| phenylpropanoid biosynthetic process           | 7/240  | 2.92% | 187/63459 | 0.29% |
| response to fungus                             | 7/240  | 2.92% | 359/63459 | 0.57% |
| response to organic nitrogen                   | 5/240  | 2.08% | 103/63459 | 0.16% |
| response to peptide hormone stimulus           | 4/240  | 1.67% | 34/63459  | 0.05% |
| response to peptide                            | 4/240  | 1.67% | 34/63459  | 0.05% |
| response to growth hormone stimulus            | 4/240  | 1.67% | 34/63459  | 0.05% |
| de-etiolation                                  | 4/240  | 1.67% | 41/63459  | 0.06% |
| flavonoid biosynthetic process                 | 4/240  | 1.67% | 45/63459  | 0.07% |
| lateral root development                       | 4/240  | 1.67% | 74/63459  | 0.12% |
| flavonoid metabolic process                    | 4/240  | 1.67% | 86/63459  | 0.14% |
| post-embryonic root development                | 4/240  | 1.67% | 97/63459  | 0.15% |
| jasmonic acid biosynthetic process             | 3/240  | 1.25% | 41/63459  | 0.06% |
| siroheme metabolic process                     | 2/240  | 0.83% | 9/63459   | 0.01% |

|                                                                                                       |         |        |             |        |
|-------------------------------------------------------------------------------------------------------|---------|--------|-------------|--------|
| siroheme biosynthetic process                                                                         | 2/240   | 0.83%  | 9/63459     | 0.01%  |
| L-asparagine biosynthetic process                                                                     | 2/240   | 0.83%  | 11/63459    | 0.02%  |
| L-asparagine metabolic process                                                                        | 2/240   | 0.83%  | 11/63459    | 0.02%  |
| cuticle hydrocarbon biosynthetic process                                                              | 2/240   | 0.83%  | 11/63459    | 0.02%  |
| <b>Cellular component</b>                                                                             |         |        |             |        |
| extracellular region                                                                                  | 17/240  | 7.08%  | 1241/63459  | 1.96%  |
| <b>Molecular function</b>                                                                             |         |        |             |        |
| catalytic activity                                                                                    | 115/240 | 47.92% | 20322/63459 | 32.02% |
| transferase activity                                                                                  | 51/240  | 21.25% | 7743/63459  | 12.20% |
| oxidoreductase activity                                                                               | 37/240  | 15.42% | 3457/63459  | 5.45%  |
| transferase activity, transferring glycosyl groups                                                    | 20/240  | 8.33%  | 1337/63459  | 2.11%  |
| transition metal ion binding                                                                          | 19/240  | 7.92%  | 1617/63459  | 2.55%  |
| transferase activity, transferring hexosyl groups                                                     | 18/240  | 7.50%  | 932/63459   | 1.47%  |
| iron ion binding                                                                                      | 17/240  | 7.08%  | 739/63459   | 1.16%  |
| oxidoreductase activity, acting on paired donors, with incorporation or reduction of molecular oxygen | 12/240  | 5%     | 783/63459   | 1.23%  |
| transferase activity, transferring alkyl or aryl (other than methyl) groups                           | 10/240  | 4.17%  | 267/63459   | 0.42%  |
| glutathione transferase activity                                                                      | 9/240   | 3.75%  | 82/63459    | 0.13%  |
| dioxygenase activity                                                                                  | 9/240   | 3.75%  | 361/63459   | 0.57%  |
| monooxygenase activity                                                                                | 8/240   | 3.33%  | 483/63459   | 0.76%  |
| quercetin 7-O-glucosyltransferase activity                                                            | 4/240   | 1.67%  | 16/63459    | 0.03%  |
| oxidoreductase activity, acting on the CH-CH group of donors, NAD or NADP as acceptor                 | 4/240   | 1.67%  | 73/63459    | 0.12%  |
| serine-type endopeptidase inhibitor activity                                                          | 4/240   | 1.67%  | 75/63459    | 0.12%  |
| endopeptidase regulator activity                                                                      | 4/240   | 1.67%  | 97/63459    | 0.15%  |
| peptidase regulator activity                                                                          | 4/240   | 1.67%  | 97/63459    | 0.15%  |
| endopeptidase inhibitor activity                                                                      | 4/240   | 1.67%  | 97/63459    | 0.15%  |
| peptidase inhibitor activity                                                                          | 4/240   | 1.67%  | 97/63459    | 0.15%  |

|                                                 |       |       |          |       |
|-------------------------------------------------|-------|-------|----------|-------|
| quercetin 3-O-glucosyltransferase activity      | 3/240 | 1.25% | 14/63459 | 0.02% |
| quercetin 4'-O-glucosyltransferase activity     | 3/240 | 1.25% | 18/63459 | 0.03% |
| inositol 3-alpha-galactosyltransferase activity | 2/240 | 0.83% | 3/63459  | 0.00% |
| precorrin-2 dehydrogenase activity              | 2/240 | 0.83% | 4/63459  | 0.01% |
| 12-oxophytodienoate reductase activity          | 2/240 | 0.83% | 7/63459  | 0.01% |
| glutamyl-tRNA reductase activity                | 2/240 | 0.83% | 7/63459  | 0.01% |

---

39

40

**Table S4 KEGG pathways of CornJA1 Vs Corn1**

| KEGG Pathway Term                                   | ID       | Sample No. | Background No. | P Value     | Corrected   | Genes                                                                                                                                                                                                                       | Hyperlink                                                                                                             |
|-----------------------------------------------------|----------|------------|----------------|-------------|-------------|-----------------------------------------------------------------------------------------------------------------------------------------------------------------------------------------------------------------------------|-----------------------------------------------------------------------------------------------------------------------|
| Metabolic pathways                                  | zma01100 | 7          | 3804           | 0.488524186 | 0.489505774 | PAC:20850353(GRMZM2G069203)<br> PAC:20880541(GRMZM2G107402)<br> PAC:20882175(GRMZM2G069542)<br> PAC:20823765(GRMZM2G306345)<br> PAC:20830586(GRMZM2G339699)<br> PAC:20867951(GRMZM2G131205)<br> PAC:20847248(GRMZM2G365160) | <a href="http://www.genome.jp/kegg-bin/show_pathway?zma01100">http://www.genome.jp/kegg-bin/show_pathway?zma01100</a> |
| Biosynthesis of secondary metabolites               | zma01110 | 5          | 1751           | 0.1777703   | 0.330149105 | PAC:20830586(GRMZM2G339699)<br> PAC:20880541(GRMZM2G107402)<br> PAC:20867951(GRMZM2G131205)<br> PAC:20824454(GRMZM2G163809)<br> PAC:20847248(GRMZM2G365160)                                                                 | <a href="http://www.genome.jp/kegg-bin/show_pathway?zma01110">http://www.genome.jp/kegg-bin/show_pathway?zma01110</a> |
| Glutathione metabolism                              | zma00480 | 4          | 166            | 0.000181184 | 0.003261307 | PAC:20871316(GRMZM2G044383)<br> PAC:20866919(GRMZM2G480439)<br> PAC:20868308(GRMZM2G042639)<br> PAC:20863364(GRMZM2G043291)                                                                                                 | <a href="http://www.genome.jp/kegg-bin/show_pathway?zma00480">http://www.genome.jp/kegg-bin/show_pathway?zma00480</a> |
| Pyruvate metabolism                                 | zma00620 | 2          | 190            | 0.042070599 | 0.289348432 | PAC:20882175(GRMZM2G069542)<br> PAC:20823765(GRMZM2G306345)                                                                                                                                                                 | <a href="http://www.genome.jp/kegg-bin/show_pathway?zma00620">http://www.genome.jp/kegg-bin/show_pathway?zma00620</a> |
| Carbon fixation in photosynthetic organisms         | zma00710 | 2          | 205            | 0.048224739 | 0.289348432 | PAC:20882175(GRMZM2G069542)<br> PAC:20823765(GRMZM2G306345)                                                                                                                                                                 | <a href="http://www.genome.jp/kegg-bin/show_pathway?zma00710">http://www.genome.jp/kegg-bin/show_pathway?zma00710</a> |
| Tryptophan metabolism                               | zma00380 | 1          | 71             | 0.115147283 | 0.330149105 | PAC:20865680(GRMZM2G141535)                                                                                                                                                                                                 | <a href="http://www.genome.jp/kegg-bin/show_pathway?zma00380">http://www.genome.jp/kegg-bin/show_pathway?zma00380</a> |
| Sulfur metabolism                                   | zma00920 | 1          | 85             | 0.136282819 | 0.330149105 | PAC:20850353(GRMZM2G069203)                                                                                                                                                                                                 | <a href="http://www.genome.jp/kegg-bin/show_pathway?zma00920">http://www.genome.jp/kegg-bin/show_pathway?zma00920</a> |
| Terpenoid backbone biosynthesis                     | zma00900 | 1          | 116            | 0.181355382 | 0.330149105 | PAC:20824454(GRMZM2G163809)                                                                                                                                                                                                 | <a href="http://www.genome.jp/kegg-bin/show_pathway?zma00900">http://www.genome.jp/kegg-bin/show_pathway?zma00900</a> |
| Porphyrin and chlorophyll metabolism                | zma00860 | 1          | 116            | 0.181355382 | 0.330149105 | PAC:20880541(GRMZM2G107402)                                                                                                                                                                                                 | <a href="http://www.genome.jp/kegg-bin/show_pathway?zma00860">http://www.genome.jp/kegg-bin/show_pathway?zma00860</a> |
| Phenylalanine, tyrosine and tryptophan biosynthesis | zma00400 | 1          | 128            | 0.198183238 | 0.330149105 | PAC:20847248(GRMZM2G365160)                                                                                                                                                                                                 | <a href="http://www.genome.jp/kegg-bin/show_pathway?zma00400">http://www.genome.jp/kegg-bin/show_pathway?zma00400</a> |
| Alanine, aspartate and glutamate metabolism         | zma00250 | 1          | 130            | 0.200955073 | 0.330149105 | PAC:20830586(GRMZM2G339699)                                                                                                                                                                                                 | <a href="http://www.genome.jp/kegg-bin/show_pathway?zma00250">http://www.genome.jp/kegg-bin/show_pathway?zma00250</a> |
| Phenylpropanoid biosynthesis                        | zma00940 | 1          | 132            | 0.203717614 | 0.330149105 | PAC:20867951(GRMZM2G131205)                                                                                                                                                                                                 | <a href="http://www.genome.jp/kegg-bin/show_pathway?zma00940">http://www.genome.jp/kegg-bin/show_pathway?zma00940</a> |
| Galactose metabolism                                | zma00052 | 1          | 144            | 0.220099404 | 0.330149105 | PAC:20825959(GRMZM2G150906)                                                                                                                                                                                                 | <a href="http://www.genome.jp/kegg-bin/show_pathway?zma00052">http://www.genome.jp/kegg-bin/show_pathway?zma00052</a> |
| Ribosome biogenesis in eukaryotes                   | zma03008 | 1          | 198            | 0.289860981 | 0.401345973 | PAC:20862149(GRMZM2G169931)                                                                                                                                                                                                 | <a href="http://www.genome.jp/kegg-bin/show_pathway?zma03008">http://www.genome.jp/kegg-bin/show_pathway?zma03008</a> |

|                                    |          |   |     |             |             |                             |                                                                                                                       |
|------------------------------------|----------|---|-----|-------------|-------------|-----------------------------|-----------------------------------------------------------------------------------------------------------------------|
| Cysteine and methionine metabolism | zma00270 | 1 | 218 | 0.314130556 | 0.403882143 | PAC:20850353(GRMZM2G069203) | <a href="http://www.genome.jp/kegg-bin/show_pathway?zma00270">http://www.genome.jp/kegg-bin/show_pathway?zma00270</a> |
| Purine metabolism                  | zma00230 | 1 | 349 | 0.454332067 | 0.489505774 | PAC:20830586(GRMZM2G339699) | <a href="http://www.genome.jp/kegg-bin/show_pathway?zma00230">http://www.genome.jp/kegg-bin/show_pathway?zma00230</a> |
| RNA transport                      | zma03013 | 1 | 357 | 0.461927049 | 0.489505774 | PAC:20862149(GRMZM2G169931) | <a href="http://www.genome.jp/kegg-bin/show_pathway?zma03013">http://www.genome.jp/kegg-bin/show_pathway?zma03013</a> |
| Plant hormone signal transduction  | zma04075 | 1 | 387 | 0.489505774 | 0.489505774 | PAC:20826302(GRMZM2G177220) | <a href="http://www.genome.jp/kegg-bin/show_pathway?zma04075">http://www.genome.jp/kegg-bin/show_pathway?zma04075</a> |

**Table S5 KEGG pathways of CornOf2 Vs Corn1**

| KEGG Pathway Term                           | ID       | Sample No. | Background No. | P Value     | Corrected   | Genes                                                                                                                                                                                                                                                                                                                       | Hyperlink                                                                                                             |
|---------------------------------------------|----------|------------|----------------|-------------|-------------|-----------------------------------------------------------------------------------------------------------------------------------------------------------------------------------------------------------------------------------------------------------------------------------------------------------------------------|-----------------------------------------------------------------------------------------------------------------------|
| Metabolic pathways                          | zma01100 | 10         | 3804           | 0.4864599   | 0.547267388 | PAC:20862762(GRMZM2G053669)<br> PAC:20851783(GRMZM2G327427)<br> PAC:20830085(GRMZM2G026182)<br> PAC:20830586(GRMZM2G339699)<br> PAC:20847955(GRMZM2G158147)<br> PAC:20867951(GRMZM2G131205)<br> PAC:20830527(GRMZM2G156861)<br> PAC:20880949(GRMZM2G139300)<br> PAC:20836281(GRMZM2G493395)<br> PAC:20869899(GRMZM2G002178) | <a href="http://www.genome.jp/kegg-bin/show_pathway?zma01100">http://www.genome.jp/kegg-bin/show_pathway?zma01100</a> |
| Biosynthesis of secondary metabolites       | zma01110 | 6          | 1751           | 0.270713271 | 0.423206641 | PAC:20862762(GRMZM2G053669)<br> PAC:20830085(GRMZM2G026182)<br> PAC:20830586(GRMZM2G339699)<br> PAC:20867951(GRMZM2G131205)<br> PAC:20824454(GRMZM2G163809)<br> PAC:20836281(GRMZM2G493395)                                                                                                                                 | <a href="http://www.genome.jp/kegg-bin/show_pathway?zma01110">http://www.genome.jp/kegg-bin/show_pathway?zma01110</a> |
| Linoleic acid metabolism                    | zma00591 | 2          | 33             | 0.003074298 | 0.083006048 | PAC:20878337(GRMZM2G102760)<br> PAC:20830527(GRMZM2G156861)                                                                                                                                                                                                                                                                 | <a href="http://www.genome.jp/kegg-bin/show_pathway?zma00591">http://www.genome.jp/kegg-bin/show_pathway?zma00591</a> |
| alpha-Linolenic acid metabolism             | zma00592 | 2          | 83             | 0.018305532 | 0.247124684 | PAC:20830527(GRMZM2G156861)<br> PAC:20869899(GRMZM2G002178)                                                                                                                                                                                                                                                                 | <a href="http://www.genome.jp/kegg-bin/show_pathway?zma00592">http://www.genome.jp/kegg-bin/show_pathway?zma00592</a> |
| Terpenoid backbone biosynthesis             | zma00900 | 2          | 116            | 0.034064949 | 0.263756469 | PAC:20824454(GRMZM2G163809)<br> PAC:20836281(GRMZM2G493395)                                                                                                                                                                                                                                                                 | <a href="http://www.genome.jp/kegg-bin/show_pathway?zma00900">http://www.genome.jp/kegg-bin/show_pathway?zma00900</a> |
| Alanine, aspartate and glutamate metabolism | zma00250 | 2          | 130            | 0.041895013 | 0.263756469 | PAC:20830586(GRMZM2G339699)<br> PAC:20862762(GRMZM2G053669)                                                                                                                                                                                                                                                                 | <a href="http://www.genome.jp/kegg-bin/show_pathway?zma00250">http://www.genome.jp/kegg-bin/show_pathway?zma00250</a> |
| Glutathione metabolism                      | zma00480 | 2          | 166            | 0.064690905 | 0.291109074 | PAC:20871316(GRMZM2G044383)<br> PAC:20863364(GRMZM2G043291)                                                                                                                                                                                                                                                                 | <a href="http://www.genome.jp/kegg-bin/show_pathway?zma00480">http://www.genome.jp/kegg-bin/show_pathway?zma00480</a> |
| Purine metabolism                           | zma00230 | 2          | 349            | 0.216897754 | 0.40996329  | PAC:20830586(GRMZM2G339699)<br> PAC:20847955(GRMZM2G158147)                                                                                                                                                                                                                                                                 | <a href="http://www.genome.jp/kegg-bin/show_pathway?zma00230">http://www.genome.jp/kegg-bin/show_pathway?zma00230</a> |
| RNA transport                               | zma03013 | 2          | 357            | 0.224264842 | 0.40996329  | PAC:20833764(GRMZM2G301904)<br> PAC:20862149(GRMZM2G169931)                                                                                                                                                                                                                                                                 | <a href="http://www.genome.jp/kegg-bin/show_pathway?zma03013">http://www.genome.jp/kegg-bin/show_pathway?zma03013</a> |
| Benzoxazinoid biosynthesis                  | zma00402 | 1          | 20             | 0.048843791 | 0.263756469 | PAC:20856241(GRMZM2G567452)                                                                                                                                                                                                                                                                                                 | <a href="http://www.genome.jp/kegg-bin/show_pathway?zma00402">http://www.genome.jp/kegg-bin/show_pathway?zma00402</a> |
| Selenocompound metabolism                   | zma00450 | 1          | 53             | 0.124375878 | 0.40996329  | PAC:20847955(GRMZM2G158147)                                                                                                                                                                                                                                                                                                 | <a href="http://www.genome.jp/kegg-bin/show_pathway?zma00450">http://www.genome.jp/kegg-bin/show_pathway?zma00450</a> |
| SNARE interactions in vesicular transport   | zma04130 | 1          | 60             | 0.139625845 | 0.40996329  | PAC:20819962(GRMZM2G417004)                                                                                                                                                                                                                                                                                                 | <a href="http://www.genome.jp/kegg-bin/show_pathway?zma04130">http://www.genome.jp/kegg-bin/show_pathway?zma04130</a> |
| Tryptophan metabolism                       | zma00380 | 1          | 71             | 0.163066131 | 0.40996329  | PAC:20865680(GRMZM2G141535)                                                                                                                                                                                                                                                                                                 | <a href="http://www.genome.jp/kegg-bin/show_pathway?zma00380">http://www.genome.jp/kegg-bin/show_pathway?zma00380</a> |
| Pantothenate and CoA biosynthesis           | zma00770 | 1          | 78             | 0.177655876 | 0.40996329  | PAC:20851783(GRMZM2G327427)                                                                                                                                                                                                                                                                                                 | <a href="http://www.genome.jp/kegg-bin/show_pathway?zma00770">http://www.genome.jp/kegg-bin/show_pathway?zma00770</a> |
| beta-Alanine metabolism                     | zma00410 | 1          | 78             | 0.177655876 | 0.40996329  | PAC:20851783(GRMZM2G327427)                                                                                                                                                                                                                                                                                                 | <a href="http://www.genome.jp/kegg-bin/show_pathway?zma00410">http://www.genome.jp/kegg-bin/show_pathway?zma00410</a> |
| Sulfur metabolism                           | zma00920 | 1          | 85             | 0.191996495 | 0.40996329  | PAC:20847955(GRMZM2G158147)                                                                                                                                                                                                                                                                                                 | <a href="http://www.genome.jp/kegg-bin/show_pathway?zma00920">http://www.genome.jp/kegg-bin/show_pathway?zma00920</a> |



|                                             |          |   |     |             |             |                             |                                                                                                                       |
|---------------------------------------------|----------|---|-----|-------------|-------------|-----------------------------|-----------------------------------------------------------------------------------------------------------------------|
| Nitrogen metabolism                         | zma00910 | 1 | 103 | 0.227757383 | 0.40996329  | PAC:20862762(GRMZM2G053669) | <a href="http://www.genome.jp/kegg-bin/show_pathway?zma00910">http://www.genome.jp/kegg-bin/show_pathway?zma00910</a> |
| Inositol phosphate metabolism               | zma00562 | 1 | 116 | 0.252616144 | 0.423206641 | PAC:20830085(GRMZM2G026182) | <a href="http://www.genome.jp/kegg-bin/show_pathway?zma00562">http://www.genome.jp/kegg-bin/show_pathway?zma00562</a> |
| Phenylpropanoid biosynthesis                | zma00940 | 1 | 132 | 0.282137761 | 0.423206641 | PAC:20867951(GRMZM2G131205) | <a href="http://www.genome.jp/kegg-bin/show_pathway?zma00940">http://www.genome.jp/kegg-bin/show_pathway?zma00940</a> |
| Galactose metabolism                        | zma00052 | 1 | 144 | 0.303526645 | 0.431327338 | PAC:20880949(GRMZM2G139300) | <a href="http://www.genome.jp/kegg-bin/show_pathway?zma00052">http://www.genome.jp/kegg-bin/show_pathway?zma00052</a> |
| Fructose and mannose metabolism             | zma00051 | 1 | 178 | 0.360796547 | 0.487075339 | PAC:20830085(GRMZM2G026182) | <a href="http://www.genome.jp/kegg-bin/show_pathway?zma00051">http://www.genome.jp/kegg-bin/show_pathway?zma00051</a> |
| Ribosome biogenesis in eukaryotes           | zma03008 | 1 | 198 | 0.392302943 | 0.494550174 | PAC:20862149(GRMZM2G169931) | <a href="http://www.genome.jp/kegg-bin/show_pathway?zma03008">http://www.genome.jp/kegg-bin/show_pathway?zma03008</a> |
| Carbon fixation in photosynthetic organisms | zma00710 | 1 | 205 | 0.402966808 | 0.494550174 | PAC:20830085(GRMZM2G026182) | <a href="http://www.genome.jp/kegg-bin/show_pathway?zma00710">http://www.genome.jp/kegg-bin/show_pathway?zma00710</a> |
| Starch and sucrose metabolism               | zma00500 | 1 | 261 | 0.481931824 | 0.547267388 | PAC:20880949(GRMZM2G139300) | <a href="http://www.genome.jp/kegg-bin/show_pathway?zma00500">http://www.genome.jp/kegg-bin/show_pathway?zma00500</a> |
| Pyrimidine metabolism                       | zma00240 | 1 | 281 | 0.507576714 | 0.548182851 | PAC:20851783(GRMZM2G327427) | <a href="http://www.genome.jp/kegg-bin/show_pathway?zma00240">http://www.genome.jp/kegg-bin/show_pathway?zma00240</a> |
| Glycolysis / Gluconeogenesis                | zma00010 | 1 | 322 | 0.556323463 | 0.577720519 | PAC:20830085(GRMZM2G026182) | <a href="http://www.genome.jp/kegg-bin/show_pathway?zma00010">http://www.genome.jp/kegg-bin/show_pathway?zma00010</a> |
| Plant hormone signal transduction           | zma04075 | 1 | 387 | 0.624083413 | 0.624083413 | PAC:20826302(GRMZM2G177220) | <a href="http://www.genome.jp/kegg-bin/show_pathway?zma04075">http://www.genome.jp/kegg-bin/show_pathway?zma04075</a> |

41

42

**Table S6 KEGG pathways of CornJAOf2 Vs Corn1**

| KEGG Pathway Term                           | ID       | Sample No. | Background No. | P Value     | Corrected  | Genes                                                                                                                                                                                                                                                                                                                                                                                          | Hyperlink                                                                                                             |
|---------------------------------------------|----------|------------|----------------|-------------|------------|------------------------------------------------------------------------------------------------------------------------------------------------------------------------------------------------------------------------------------------------------------------------------------------------------------------------------------------------------------------------------------------------|-----------------------------------------------------------------------------------------------------------------------|
| Metabolic pathways                          | zma01100 | 12         | 3804           | 0.406137597 | 0.4984416  | PAC:20832956(GRMZM2G025182)<br> PAC:20862762(GRMZM2G053669)<br> PAC:20850353(GRMZM2G069203)<br> PAC:20880541(GRMZM2G107402)<br> PAC:20847955(GRMZM2G158147)<br> PAC:20830586(GRMZM2G339699)<br> PAC:20864552(AC213521.3_FG005)<br> PAC:20867951(GRMZM2G131205)<br> PAC:20830527(GRMZM2G156861)<br> PAC:20865957(GRMZM2G155242)<br> PAC:20837807(GRMZM2G078472)<br> PAC:20877852(GRMZM2G029048) | <a href="http://www.genome.jp/kegg-bin/show_pathway?zma01100">http://www.genome.jp/kegg-bin/show_pathway?zma01100</a> |
| Biosynthesis of secondary metabolites       | zma01110 | 9          | 1751           | 0.059466334 | 0.22937015 | PAC:20862762(GRMZM2G053669)<br> PAC:20880541(GRMZM2G107402)<br> PAC:20830586(GRMZM2G339699)<br> PAC:20864552(AC213521.3_FG005)<br> PAC:20867951(GRMZM2G131205)<br> PAC:20824454(GRMZM2G163809)<br> PAC:20865957(GRMZM2G155242)<br> PAC:20837807(GRMZM2G078472)<br> PAC:20877852(GRMZM2G029048)                                                                                                 | <a href="http://www.genome.jp/kegg-bin/show_pathway?zma01110">http://www.genome.jp/kegg-bin/show_pathway?zma01110</a> |
| Nitrogen metabolism                         | zma00910 | 3          | 103            | 0.003211111 | 0.08306132 | PAC:20862762(GRMZM2G053669)<br> PAC:20837807(GRMZM2G078472)<br> PAC:20877852(GRMZM2G029048)                                                                                                                                                                                                                                                                                                    | <a href="http://www.genome.jp/kegg-bin/show_pathway?zma00910">http://www.genome.jp/kegg-bin/show_pathway?zma00910</a> |
| Alanine, aspartate and glutamate metabolism | zma00250 | 3          | 130            | 0.00615269  | 0.08306132 | PAC:20830586(GRMZM2G339699)<br> PAC:20862762(GRMZM2G053669)<br> PAC:20837807(GRMZM2G078472)                                                                                                                                                                                                                                                                                                    | <a href="http://www.genome.jp/kegg-bin/show_pathway?zma00250">http://www.genome.jp/kegg-bin/show_pathway?zma00250</a> |
| Sulfur metabolism                           | zma00920 | 2          | 85             | 0.024706137 | 0.22235523 | PAC:20847955(GRMZM2G158147)<br> PAC:20850353(GRMZM2G069203)                                                                                                                                                                                                                                                                                                                                    | <a href="http://www.genome.jp/kegg-bin/show_pathway?zma00920">http://www.genome.jp/kegg-bin/show_pathway?zma00920</a> |
| Porphyrin and chlorophyll metabolism        | zma00860 | 2          | 116            | 0.043646214 | 0.22937015 | PAC:20880541(GRMZM2G107402)<br> PAC:20864552(AC213521.3_FG005)                                                                                                                                                                                                                                                                                                                                 | <a href="http://www.genome.jp/kegg-bin/show_pathway?zma00860">http://www.genome.jp/kegg-bin/show_pathway?zma00860</a> |
| Phenylpropanoid biosynthesis                | zma00940 | 2          | 132            | 0.054972748 | 0.22937015 | PAC:20867951(GRMZM2G131205)<br> PAC:20877852(GRMZM2G029048)                                                                                                                                                                                                                                                                                                                                    | <a href="http://www.genome.jp/kegg-bin/show_pathway?zma00940">http://www.genome.jp/kegg-bin/show_pathway?zma00940</a> |
| Purine metabolism                           | zma00230 | 2          | 349            | 0.264046628 | 0.42559782 | PAC:20830586(GRMZM2G339699)<br> PAC:20847955(GRMZM2G158147)                                                                                                                                                                                                                                                                                                                                    | <a href="http://www.genome.jp/kegg-bin/show_pathway?zma00230">http://www.genome.jp/kegg-bin/show_pathway?zma00230</a> |
| Plant hormone signal transduction           | zma04075 | 2          | 387            | 0.304472406 | 0.43267131 | PAC:20873155(GRMZM2G129954)<br> PAC:20826302(GRMZM2G177220)                                                                                                                                                                                                                                                                                                                                    | <a href="http://www.genome.jp/kegg-bin/show_pathway?zma04075">http://www.genome.jp/kegg-bin/show_pathway?zma04075</a> |

|                                          |          |   |     |             |            |                             |                                                                                                                       |
|------------------------------------------|----------|---|-----|-------------|------------|-----------------------------|-----------------------------------------------------------------------------------------------------------------------|
| Benzoxazinoid biosynthesis               | zma00402 | 1 | 20  | 0.055774582 | 0.22937015 | PAC:20856241(GRMZM2G567452) | <a href="http://www.genome.jp/kegg-bin/show_pathway?zma00402">http://www.genome.jp/kegg-bin/show_pathway?zma00402</a> |
| Linoleic acid metabolism                 | zma00591 | 1 | 33  | 0.090378061 | 0.30502596 | PAC:20830527(GRMZM2G156861) | <a href="http://www.genome.jp/kegg-bin/show_pathway?zma00591">http://www.genome.jp/kegg-bin/show_pathway?zma00591</a> |
| Fatty acid elongation                    | zma00062 | 1 | 38  | 0.103352901 | 0.3100587  | PAC:20869331(GRMZM2G031790) | <a href="http://www.genome.jp/kegg-bin/show_pathway?zma00062">http://www.genome.jp/kegg-bin/show_pathway?zma00062</a> |
| Selenocompound metabolism                | zma00450 | 1 | 53  | 0.141196853 | 0.3812315  | PAC:20847955(GRMZM2G158147) | <a href="http://www.genome.jp/kegg-bin/show_pathway?zma00450">http://www.genome.jp/kegg-bin/show_pathway?zma00450</a> |
| Tryptophan metabolism                    | zma00380 | 1 | 71  | 0.184543643 | 0.42559782 | PAC:20865680(GRMZM2G141535) | <a href="http://www.genome.jp/kegg-bin/show_pathway?zma00380">http://www.genome.jp/kegg-bin/show_pathway?zma00380</a> |
| Carotenoid biosynthesis                  | zma00906 | 1 | 81  | 0.207689326 | 0.42559782 | PAC:20874809(GRMZM2G152135) | <a href="http://www.genome.jp/kegg-bin/show_pathway?zma00906">http://www.genome.jp/kegg-bin/show_pathway?zma00906</a> |
| alpha-Linolenic acid metabolism          | zma00592 | 1 | 83  | 0.212240449 | 0.42559782 | PAC:20830527(GRMZM2G156861) | <a href="http://www.genome.jp/kegg-bin/show_pathway?zma00592">http://www.genome.jp/kegg-bin/show_pathway?zma00592</a> |
| Phenylalanine metabolism                 | zma00360 | 1 | 103 | 0.256363045 | 0.42559782 | PAC:20877852(GRMZM2G029048) | <a href="http://www.genome.jp/kegg-bin/show_pathway?zma00360">http://www.genome.jp/kegg-bin/show_pathway?zma00360</a> |
| Pentose and glucuronate interconversions | zma00040 | 1 | 105 | 0.260639493 | 0.42559782 | PAC:20832956(GRMZM2G025182) | <a href="http://www.genome.jp/kegg-bin/show_pathway?zma00040">http://www.genome.jp/kegg-bin/show_pathway?zma00040</a> |
| Terpenoid backbone biosynthesis          | zma00900 | 1 | 116 | 0.283731882 | 0.42559782 | PAC:20824454(GRMZM2G163809) | <a href="http://www.genome.jp/kegg-bin/show_pathway?zma00900">http://www.genome.jp/kegg-bin/show_pathway?zma00900</a> |
| Inositol phosphate metabolism            | zma00562 | 1 | 116 | 0.283731882 | 0.42559782 | PAC:20865957(GRMZM2G155242) | <a href="http://www.genome.jp/kegg-bin/show_pathway?zma00562">http://www.genome.jp/kegg-bin/show_pathway?zma00562</a> |
| Galactose metabolism                     | zma00052 | 1 | 144 | 0.339364754 | 0.45814242 | PAC:20825959(GRMZM2G150906) | <a href="http://www.genome.jp/kegg-bin/show_pathway?zma00052">http://www.genome.jp/kegg-bin/show_pathway?zma00052</a> |
| Glutathione metabolism                   | zma00480 | 1 | 166 | 0.380079491 | 0.48867363 | PAC:20863364(GRMZM2G043291) | <a href="http://www.genome.jp/kegg-bin/show_pathway?zma00480">http://www.genome.jp/kegg-bin/show_pathway?zma00480</a> |
| Ribosome biogenesis in eukaryotes        | zma03008 | 1 | 198 | 0.434938141 | 0.51057956 | PAC:20862149(GRMZM2G169931) | <a href="http://www.genome.jp/kegg-bin/show_pathway?zma03008">http://www.genome.jp/kegg-bin/show_pathway?zma03008</a> |
| Cysteine and methionine metabolism       | zma00270 | 1 | 218 | 0.466773753 | 0.52512047 | PAC:20850353(GRMZM2G069203) | <a href="http://www.genome.jp/kegg-bin/show_pathway?zma00270">http://www.genome.jp/kegg-bin/show_pathway?zma00270</a> |
| Starch and sucrose metabolism            | zma00500 | 1 | 261 | 0.529375196 | 0.57172521 | PAC:20832956(GRMZM2G025182) | <a href="http://www.genome.jp/kegg-bin/show_pathway?zma00500">http://www.genome.jp/kegg-bin/show_pathway?zma00500</a> |
| RNA transport                            | zma03013 | 1 | 357 | 0.644252397 | 0.66543998 | PAC:20862149(GRMZM2G169931) | <a href="http://www.genome.jp/kegg-bin/show_pathway?zma03013">http://www.genome.jp/kegg-bin/show_pathway?zma03013</a> |
| Oxidative phosphorylation                | zma00190 | 1 | 378 | 0.665439976 | 0.66543998 | PAC:20849785(GRMZM2G026470) | <a href="http://www.genome.jp/kegg-bin/show_pathway?zma00190">http://www.genome.jp/kegg-bin/show_pathway?zma00190</a> |

43

44

45 **Table S7: Fifteen screened up-regulated genes involved in maize defense resistance against Asian corn borer feeding**

| Category | SEQ ID           | Gene name      | RNA-Seq (log <sub>2</sub> FC) |               |                 | Function                                    |
|----------|------------------|----------------|-------------------------------|---------------|-----------------|---------------------------------------------|
|          |                  |                | CornOf2/Corn1                 | CornJA1/Corn1 | CornJAOf2/Corn1 |                                             |
| JA       | GRMZM2G179092    | <i>TPS10</i>   | 10.46                         | -0.08         | 7.20            | terpene synthesis                           |
| JA       | GRMZM2G156861    | <i>LOX1</i>    | 6.866                         | 1.960         | 4.060           | linoleic and $\alpha$ -linolenic metabolism |
| JA       | GRMZM2G156632    | <i>BBTI2</i>   | 5.01                          | 0.680         | 5.620           | serine protease inhibitor                   |
| SA/JA    | GRMZM2G053669    | <i>ASN1</i>    | 4.18                          | 2.04          | 4.77            | conversion of Gln and Asp to Asn and Glu    |
| JA       | GRMZM2G312997    | <i>DOX</i>     | 3.65                          | 2.96          | 3.72            | oxygenation of fatty acids                  |
| JA       | AC208221.3_FG002 | <i>BBTI2</i>   | 3.55                          | 2.61          | 2.66            | serine protease inhibitor                   |
| JA       | GRMZM2G493395    | <i>DXS</i>     | 3.48                          | -3.50         | 0.77            | 1-deoxyxylulose-5-phosphate production      |
| JA       | GRMZM2G096680    | <i>CI-1B</i>   | 3.29                          | 1.56          | 4.39            | serine protease inhibitor                   |
| JA       | GRMZM2G102760    | <i>LOX5</i>    | 2.98                          | 0.059         | 1.41            | linoleic and $\alpha$ -linolenic metabolism |
| SA/JA    | GRMZM2G301904    | <i>eIF3</i>    | 2.87                          | 1.27          | 1.02            | transcription initiation                    |
| JA       | GRMZM2G002178    | <i>AOS</i>     | 2.83                          | 0.28          | 1.12            | octadecanoid synthesis                      |
| JA       | GRMZM2G011523    | <i>BBTI11</i>  | 2.83                          | -1.81         | 0.48            | serine protease inhibitor                   |
| JA       | GRMZM2G026182    | <i>TIM</i>     | 2.71                          | 1.01          | 1.01            | 1-deoxyxylulose-5-phosphate production      |
| JA       | GRMZM2G007928    | <i>BBTI13</i>  | 2.57                          | 2.01          | 2.88            | serine protease inhibitor                   |
| JA       | GRMZM5G836222    | <i>A20/ANI</i> | 2.06                          | 1.33          | 1.84            | abiotic stress tolerance                    |

46 Note: JA: jasmonic acid; SA: salicylic acid; TPS10: terpene synthase 10; LOX1/5: lipoxygenase 1/5; BBTI2/11/12/13: Bowman-Birk type inhibitor 2/11/12/13;  
47 ASN1: asparagine synthetase 1; DOX:  $\alpha$ -dioxygenase; DXS:1-deoxyxylulose-5-phosphate synthase; CI-1B: subtilisin-chymotrypsin inhibitor CI-1B;  
48 eIF3:eukaryotic translation initiation; AOS: allene oxide synthase; TIM: triosephosphate isomerase; A20/ANI: zinc finger A20 and AN1 domain-containing  
49 stress-associated protein.

50 Table S8: Nine up-regulated gene expression patterns identified by both RNA-Seq and qRT-PCR

| Gene ID          | Genes          | Descriptions                                                              | Corn1   | CornOf2 | CorJA1   | CornJAOf2 | CornOf2<br>fold changes |         | CornJA1<br>fold changes |         | CornJAOf2<br>fold changes |         |
|------------------|----------------|---------------------------------------------------------------------------|---------|---------|----------|-----------|-------------------------|---------|-------------------------|---------|---------------------------|---------|
|                  |                |                                                                           |         |         |          |           | RNA-Seq                 | qRT-PCR | RNA-Seq                 | qRT-PCR | RNA-Seq                   | qRT-PCR |
| GRMZM2G102760    | <i>LOX5</i>    | lipoxygenase 5                                                            | 9.12094 | 71.9712 | 9.45743  | 24.2126   | 7.9                     | 1.8     | 1.0                     | 0.9     | 2.7                       | 2.5     |
| AC208221.3_FG002 | <i>BBT12</i>   | Bowman-Birk type bran<br>trypsin inhibitor<br>precursor                   | 29.7042 | 348.324 | 181.395  | 187.164   | 11.7                    | 7.3     | 6.1                     | 3.0     | 6.3                       | 3.1     |
| GRMZM2G011523    | <i>BBT11</i>   |                                                                           | 59.7273 | 424.36  | 17.0728  | 83.1047   | 7.1                     | 9.9     | 0.3                     | 1.5     | 1.4                       | 5.1     |
| GRMZM2G156632    | <i>BBT12</i>   |                                                                           | 4.07149 | 131.088 | 6.53184  | 200.857   | 32.2                    | 34.2    | 1.6                     | 7.2     | 49.3                      | 10.5    |
| GRMZM2G007928    | <i>BBT13</i>   |                                                                           | 61.8682 | 366.857 | 248.906  | 456.12    | 5.9                     | 5.1     | 4.00                    | 4.7     | 7.4                       | 15.9    |
| GRMZM2G096680    | <i>CI-1B</i>   | subtilisin-chymotrypsin<br>inhibitor CI-1B                                | 0       | 9.79193 | 0.294325 | 20.9477   | -                       | 6.8     | -                       | 2.8     | -                         | 17.2    |
| GRMZM2G179092    | <i>TPS10</i>   | terpene synthase10                                                        | 0.10597 | 149.202 | 0        | 15.5579   | 1408.0                  | 42.6    | -                       | 10.3    | 146.8                     | 31.9    |
| GRMZM2G312997    | <i>DOX</i>     | fatty acid alpha-<br>dioxygenase                                          | 2.12431 | 26.7002 | 16.5777  | 27.9404   | 12.6                    | 18.5    | 7.8                     | 6.4     | 13.2                      | 36.8    |
| GRMZM5G836222    | <i>A20/ANI</i> | zinc finger A20 and<br>AN1 domain-containing<br>stress-associated protein | 335.155 | 1401.45 | 843.635  | 1200.43   | 4.2                     | 5.8     | 2.5                     | 2.2     | 3.6                       | 5.2     |

51 **Supplementary figure**

52

53 **Figure S1: Distribution and classification of genes according to Gene Ontology analyses of DEGs in**  
 54 **CornJA1, CornOf2, and CornJAOf2 treatments.**

55 Note: Corn1 was the control group. Analyzed DEGs had at least 10 FPKM in at least one treatment and  
 56 were at least 2 fold changes.

57

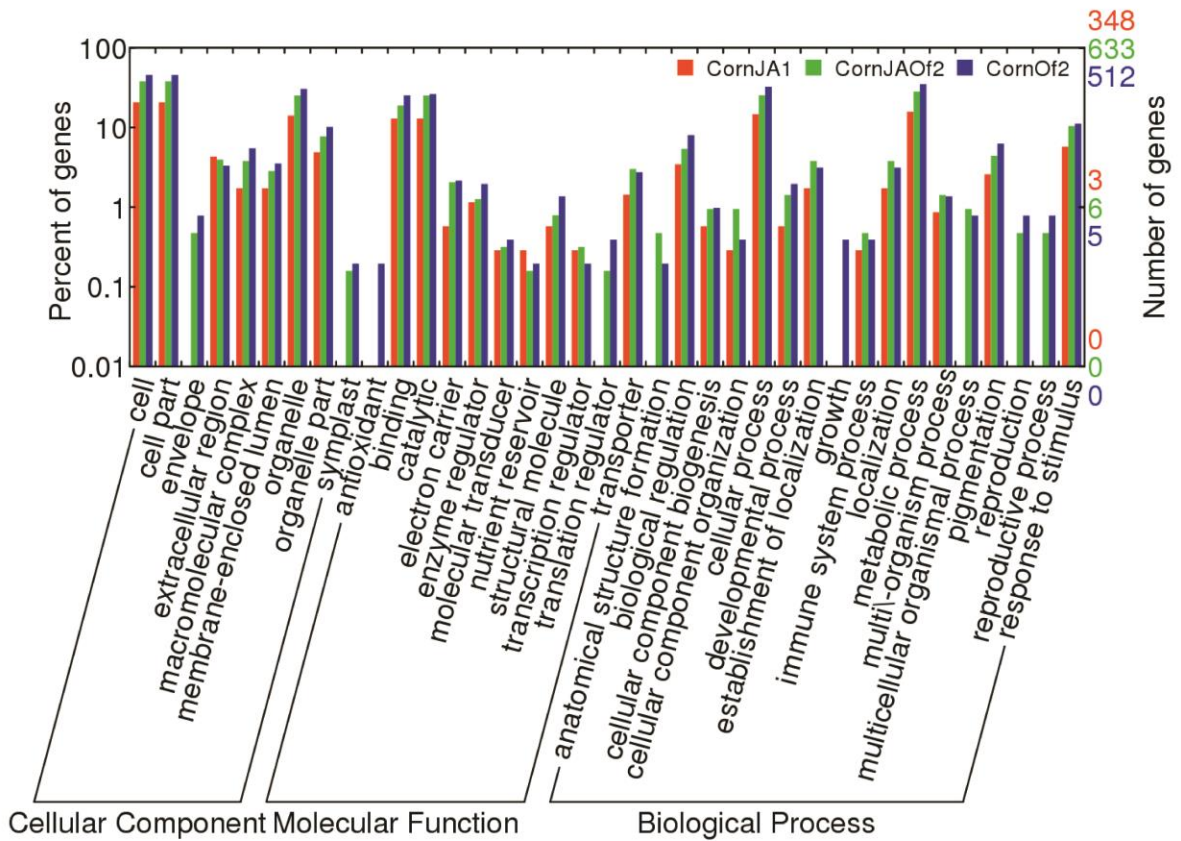

58
